# Supplementary material for: Effect of ionic strength on aggregation of nile red and coumarin 30 in aqueous medium: primary kinetic salt effect or salting-out effect?
Source: Royal Society of Chemistry journal article supplement (doi:10.1039/d3ra03829g), 2023-01-01
Supplement: d3ra03829g1.pdf [file d3ra03829g1.pdf]

## **Effect of Ionic Strength on Aggregation of Nile Red and Coumarin 30 in Aqueous Medium: Primary Kinetic Salt Effect or Salting-out Effect?**

Nitin Chattopadhyay\*, Arindam Das

Department of Chemistry, Jadavpur University, Kolkata - 700 032, India

\*Corresponding author.

E-mail: [nitin.chattopadhyay@yahoo.com](mailto:nitin.chattopadhyay@yahoo.com)

**Electronic Supplementary Information (ESI)**

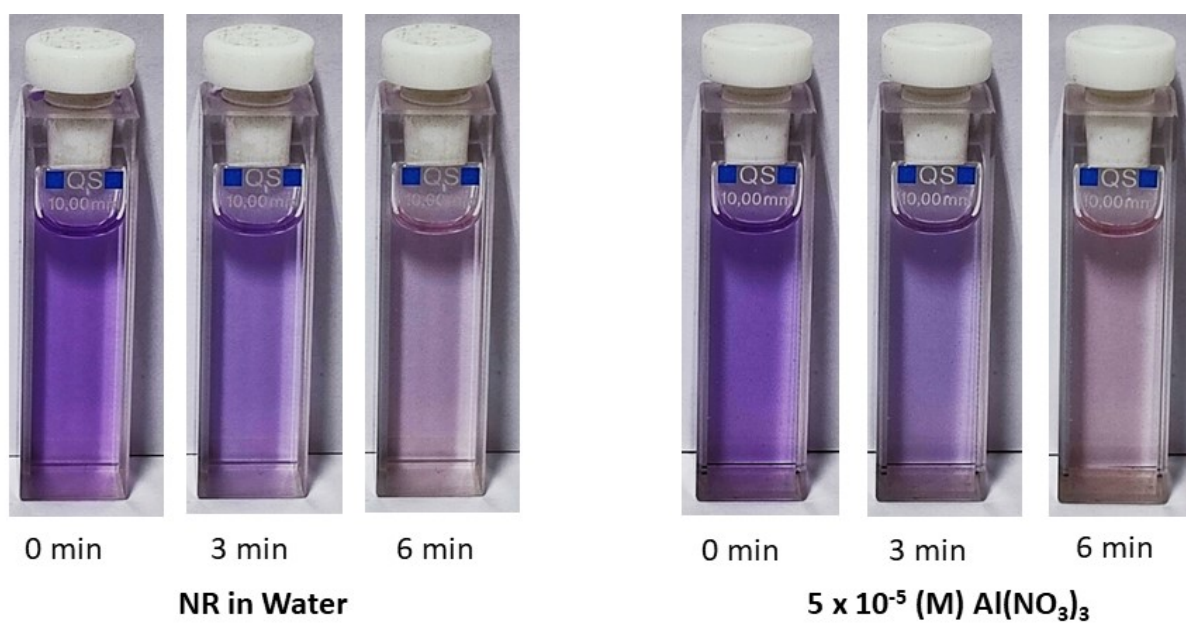

**Figure S1:** Snap shots of NR in water and in  $5 \times 10^{-5}$  (M)  $\text{Al}(\text{NO}_3)_3$  solution at different times.

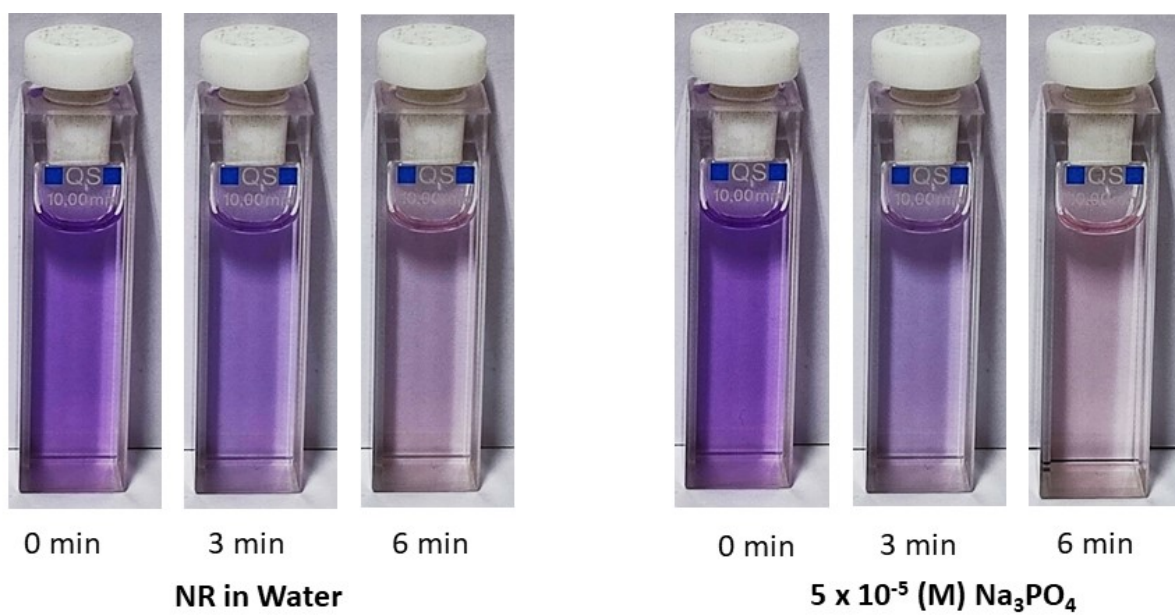

**Figure S2:** Snap shots of NR in water and in  $5 \times 10^{-5}$  (M)  $\text{Na}_3\text{PO}_4$  solution at different times.

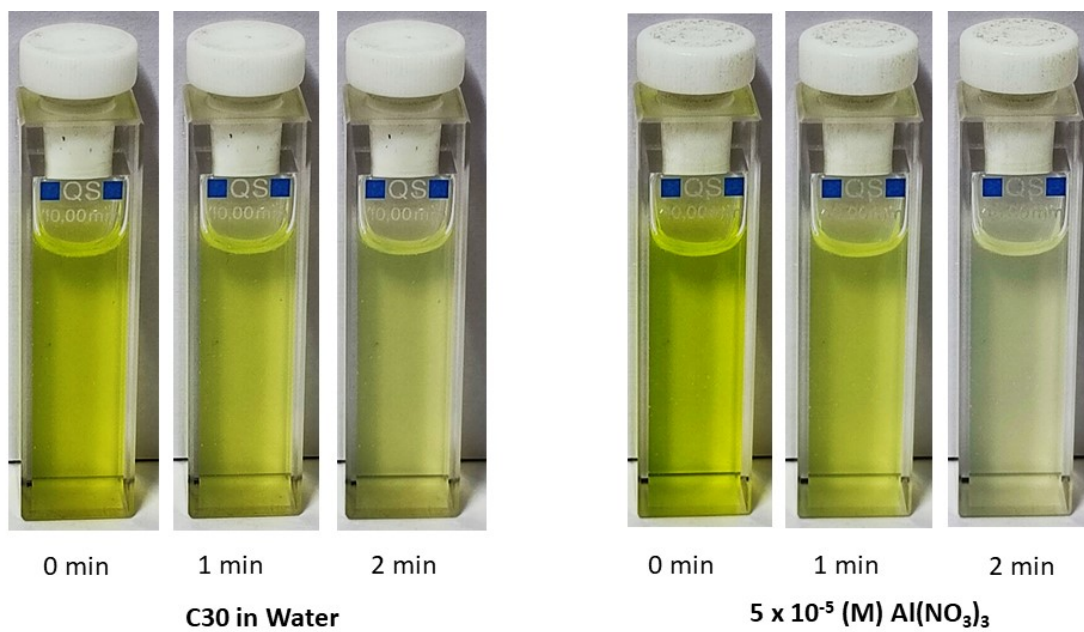

**Figure S3:** Snap shots of C30 in water and in  $5 \times 10^{-5}$  (M) Al(NO<sub>3</sub>)<sub>3</sub> solution at different times.

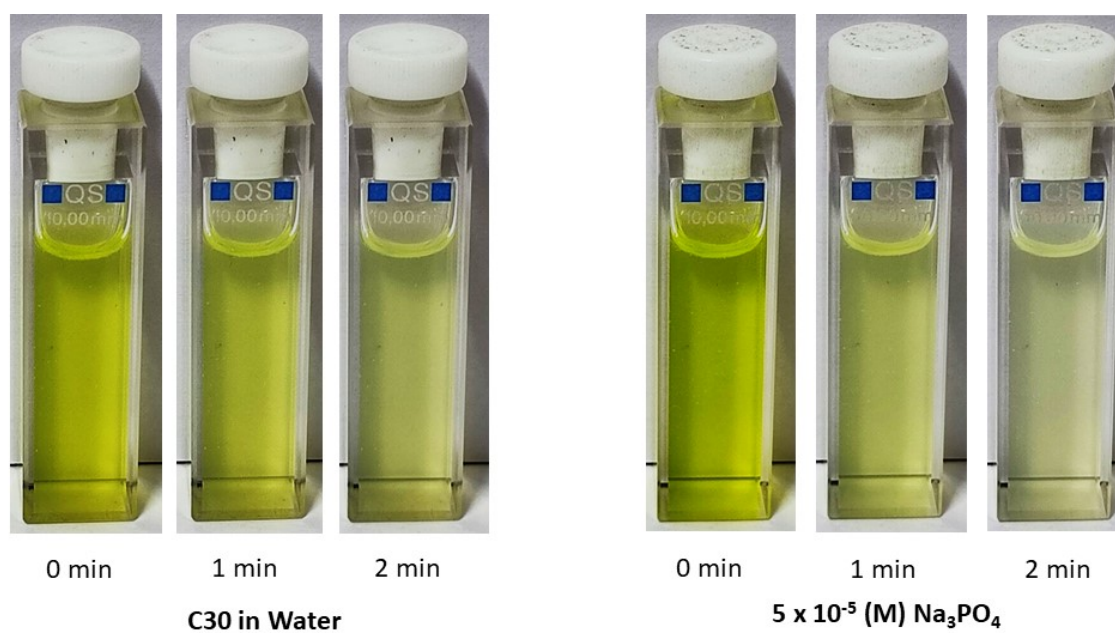

**Figure S4:** Snap shots of C30 in water and in  $5 \times 10^{-5}$  (M) Na<sub>3</sub>PO<sub>4</sub> solution at different times.

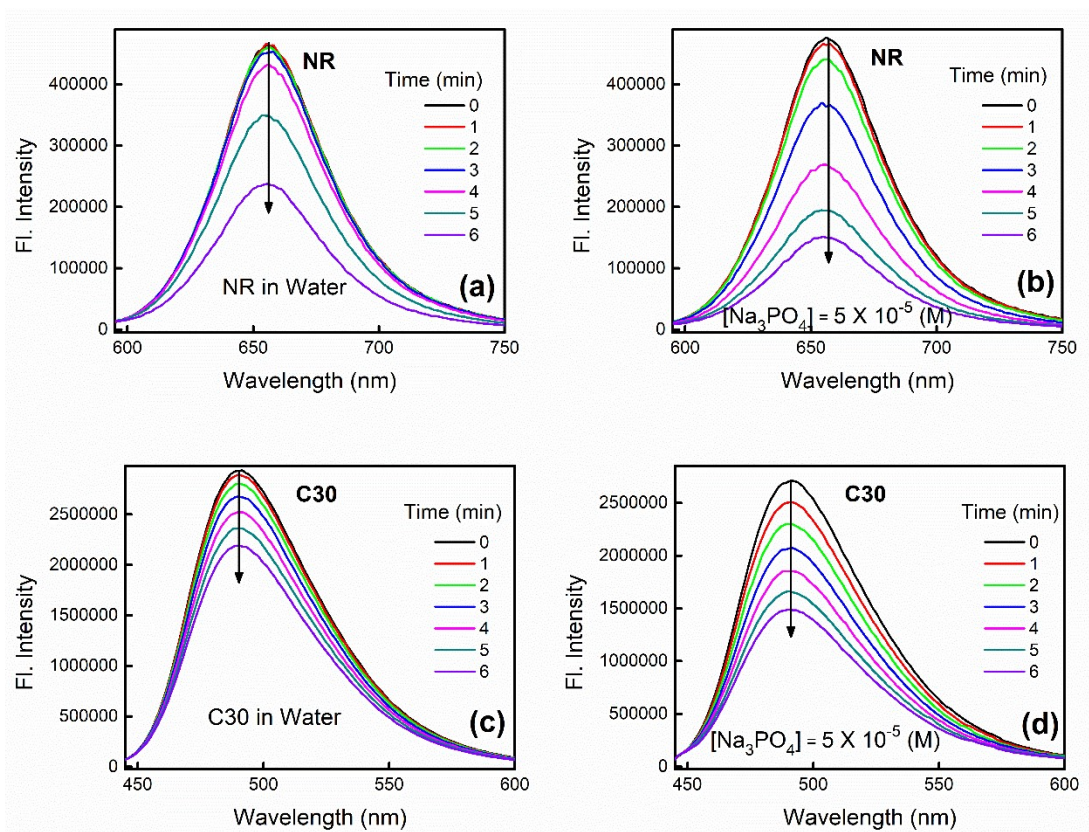

**Figure S5.** Fluorescence spectra of NR in (a) water and (b)  $5 \times 10^{-5}$  (M)  $\text{Na}_3\text{PO}_4$  solution with increasing time. Fluorescence spectra of C30 in (c) water and (d)  $5 \times 10^{-5}$  (M)  $\text{Na}_3\text{PO}_4$  solution with increasing time.

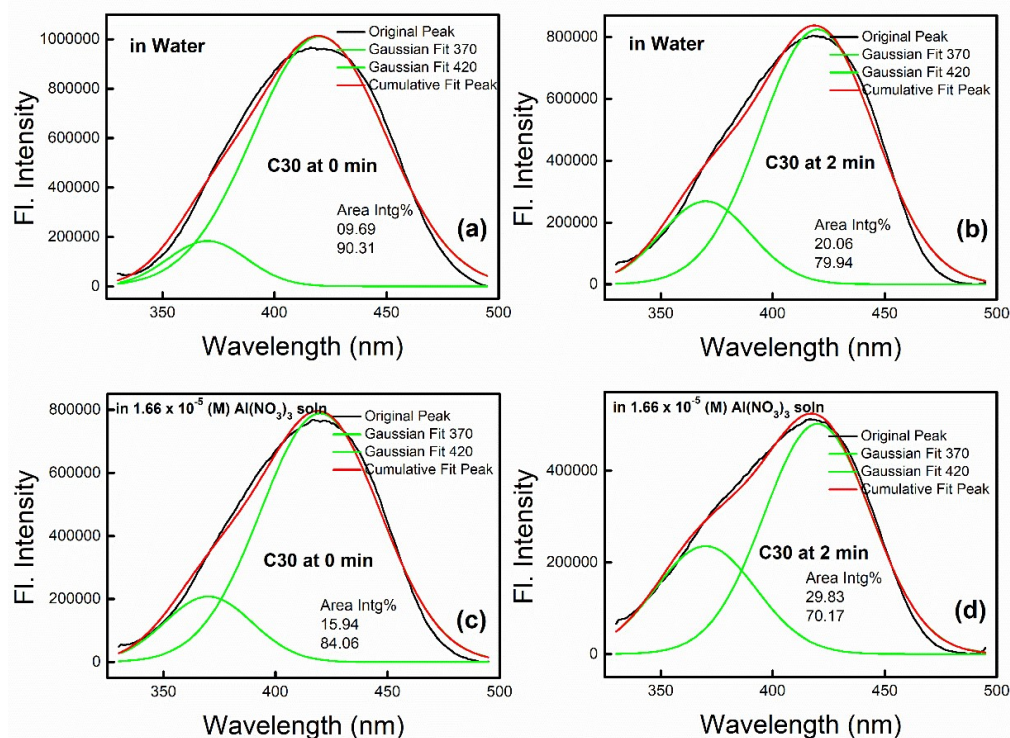

**Figure S6.** Resolved fluorescence excitation spectra of C30 ((a) and (b)) at  $\lambda_{\text{em}} = 505$  nm in water at different times. Resolved fluorescence excitation spectra of C30 ((c) and (d)) at  $\lambda_{\text{em}} = 505$  nm in  $1.66 \times 10^{-5}$  (M)  $\text{Al}(\text{NO}_3)_3$  solution at different times.

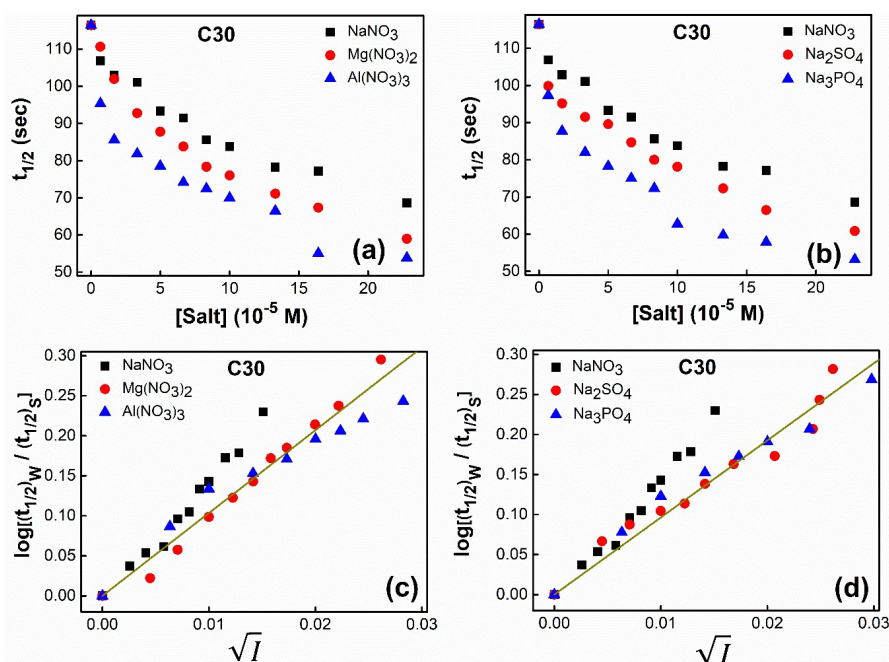

**Figure S7.** Variation of half-life ( $t_{1/2}$ ) vs. salt concentration for C30 with a variation of (a) cation and (b) anion; (c) and (d) gives plots of  $\log(k/k^0)$  vs  $\sqrt{I}$  for C30, where

$$k/k^0 = (t_{1/2})_w / (t_{1/2})_s$$

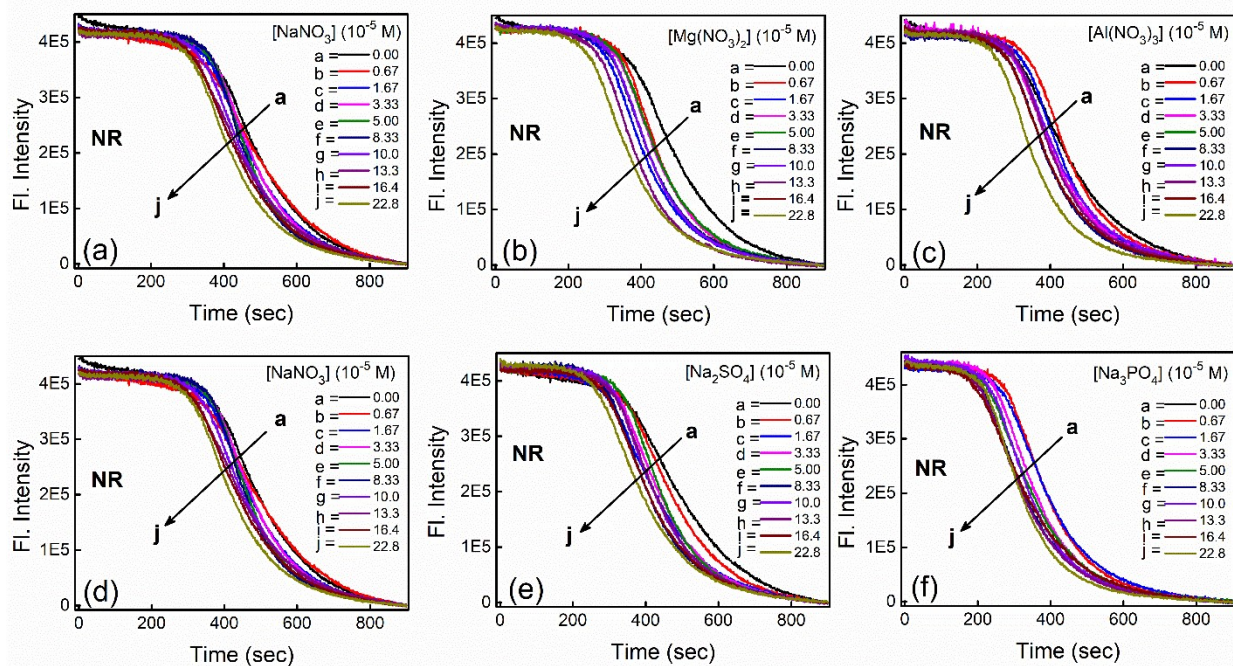

**Figure S8.** Fluorescence kinetic decay of NR at  $\lambda_{\text{em}} = 656$  nm in water with different salt concentrations ( $\lambda_{\text{ex}} = 580$  nm).

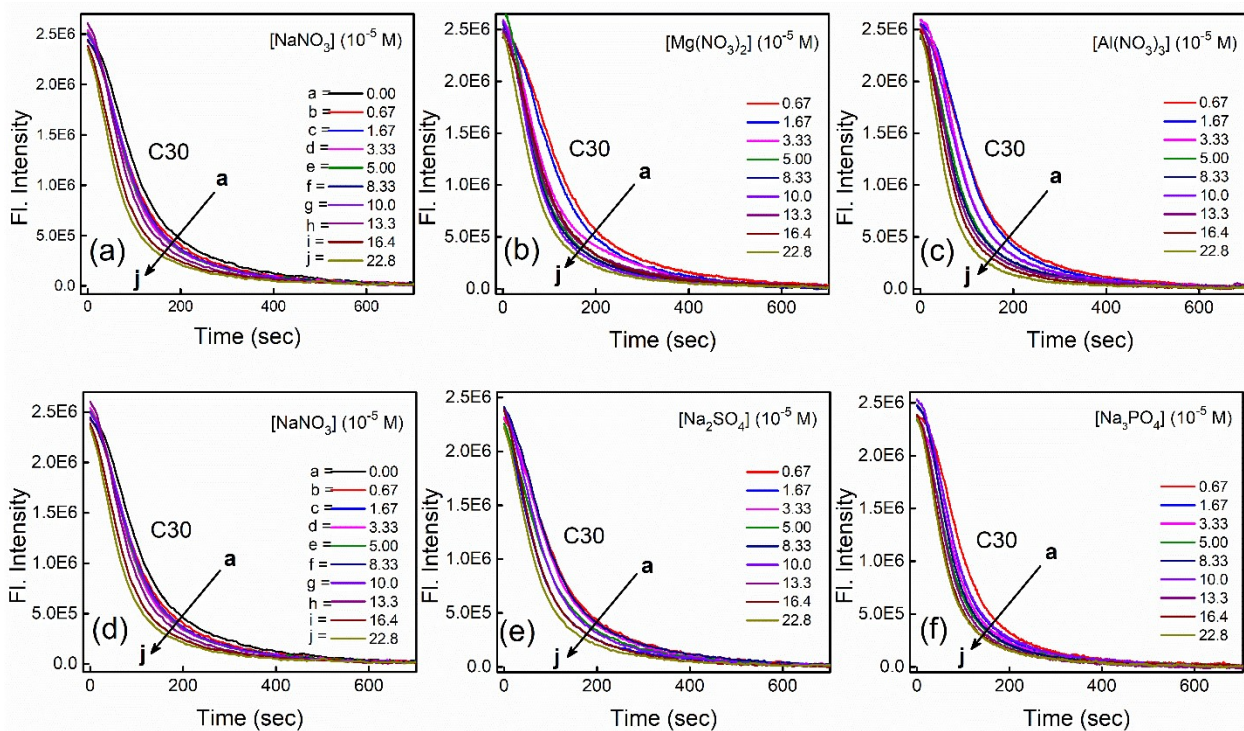

**Figure S9.** Fluorescence kinetic decay of C30 at  $\lambda_{\text{em}} = 495$  nm in water with different salt concentrations ( $\lambda_{\text{ex}} = 430$  nm).
